# Supplementary material for: Fluorine Effect in the Gelation Ability of Low Molecular Weight Gelators
Source: MDPI journal article supplement (doi:10.3390/gels8020098), 2022-02-08
Supplement: s1 [file s1]

## Supporting Information

### Fluorine Effect in the Gelation Ability of Low Molecular Weight Gelators

Paolo Ravarino <sup>1</sup>, Nadia Di Domenico <sup>1</sup>, Marianna Barbalinardo <sup>2</sup>, Davide Faccio <sup>1</sup>, Giuseppe Falini <sup>1</sup>, Demetra Giuri <sup>1\*</sup>, and Claudia Tomasini <sup>1\*</sup>

<sup>1</sup> Dipartimento di Chimica “Giacomo Ciamician” Università di Bologna – Via Selmi, 2 – 40126 Bologna – Italy <sup>2</sup> Istituto per lo Studio dei Materiali Nanostrutturati, Consiglio Nazionale delle Ricerche, (ISMN-CNR) - Via P. Gobetti 101 – 40129 Bologna Italy - mail: [claudia.tomasini@unibo.it](mailto:claudia.tomasini@unibo.it)

|                                                                                                                                                                                                                      |               |
|----------------------------------------------------------------------------------------------------------------------------------------------------------------------------------------------------------------------|---------------|
| <b>Scheme S1.</b> Reagents and conditions for the preparation of <b>F0</b> , <b>F1</b> and <b>F2</b>                                                                                                                 | Page S2       |
| Characterization of compounds <b>F0</b> , <b>F1</b> and <b>F2</b>                                                                                                                                                    | Page S3       |
| NMR and IR spectra of the compound <b>F1</b>                                                                                                                                                                         | Pages S4-S8   |
| <b>Table S1.</b> Detailed list of the samples prepared with the solvent switch method                                                                                                                                | Page S9       |
| <b>Table S2.</b> Detailed list of the samples prepared with the pH change method and the addition of calcium chloride                                                                                                | Page S10      |
| <b>Figure S1.</b> Absorbance spectra of the gels samples                                                                                                                                                             | Page S11      |
| <b>Figure S2.</b> Morphology of the dried hydrogels <b>1</b> , <b>4</b> , <b>7</b> , <b>13</b> and <b>16</b> , analysed through an optical microscope with different magnifications                                  | Page S12      |
| <b>Figure S3.</b> Morphology of the dried hydrogels <b>19</b> , <b>22</b> , <b>25</b> , <b>28</b> , <b>31</b> and <b>34</b> , analysed through an optical microscope with different magnifications                   | Page S13      |
| <b>Figure S4.</b> Morphology of the dried hydrogels <b>37</b> , <b>38</b> , <b>39</b> , <b>41</b> and <b>42</b> , analysed through an optical microscope with different magnifications                               | Page S14      |
| <b>Figure S5.</b> Morphology of the dried hydrogels <b>43</b> , <b>44</b> , <b>45</b> , <b>46</b> , <b>47</b> and <b>48</b> , analysed through an optical microscope with different magnifications                   | Page S15      |
| <b>Figures S6-S7.</b> SEM images of the dried hydrogels <b>19</b> , <b>22</b> , <b>25</b> , <b>28</b> , <b>31</b> , <b>34</b> and <b>43-48</b>                                                                       | Pages S16-S17 |
| <b>Figures S8-S10.</b> X-ray powder diffraction patterns of the xerogels from molecules <b>F0</b> , <b>F1</b> and <b>F2</b>                                                                                          | Pages S18-S19 |
| <b>Figure S11.</b> Amplitude sweep analysis of the samples <b>1</b> , <b>4</b> , <b>7</b> , <b>13</b> , <b>16</b> , <b>19</b> , <b>22</b> , <b>25</b> , <b>28</b> , <b>31</b> and <b>34</b>                          | Page S20      |
| <b>Figure S12.</b> Amplitude sweep analysis of the samples <b>37</b> , <b>38</b> , <b>39</b> and <b>41-48</b>                                                                                                        | Page S21      |
| <b>Figure S13.</b> Time sweep analysis of the samples <b>37-39</b> and <b>43-45</b> obtained with the addition of GdL                                                                                                | Page S22      |
| <b>Table S3.</b> Summary of the Properties of Gels                                                                                                                                                                   | Page S23      |
| <b>Figure S14.</b> Thixotropic behaviour of the samples <b>1</b> , <b>4</b> , <b>7</b> , <b>13</b> , <b>16</b> , <b>19</b> , <b>22</b> , <b>25</b> , <b>28</b> , <b>31</b> and <b>34</b> analysed with the rheometer | Page S24      |
| <b>Figure S15.</b> Thixotropic behaviour of the samples <b>37</b> , <b>38</b> , <b>39</b> and <b>41-48</b> , analysed with the rheometer                                                                             | Page S25      |
| <b>Figure S16.</b> Thixotropic behaviour of the gels formed after vigorous shaking (left) and 16 hours of recovery (right)                                                                                           | Page S26      |
| <b>Figure S17.</b> Optical micrograph of cells in DPBS (control)                                                                                                                                                     | Page 27       |

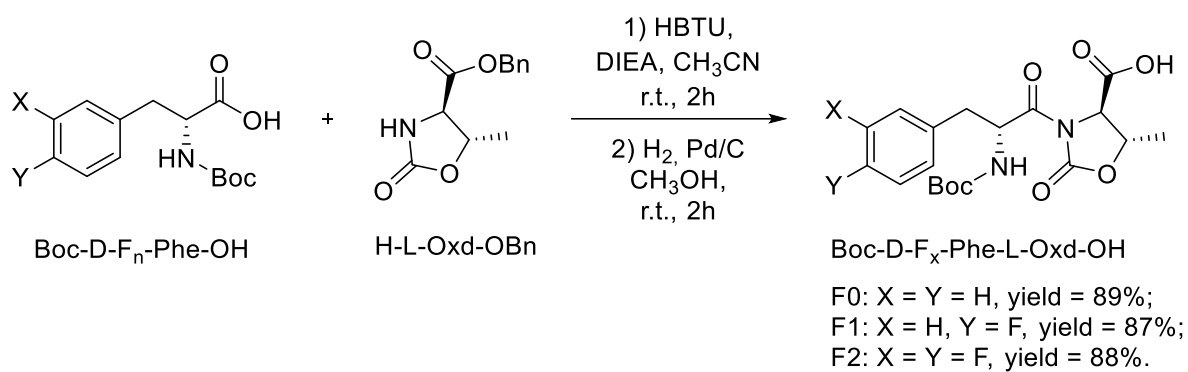

**Scheme S1.** Reagents and conditions: 1) Boc-D-F<sub>n</sub>-Phe-OH (1.0 eq), H-L-Oxd-OBn (1.0 eq), HBTU (1.1 eq), DIEA (2.2 eq) in CH<sub>3</sub>CN (concentration of the first two reagents is 0.1 M) for 2 h at r.t.. 2) Boc-D-F<sub>n</sub>-Phe-L-Oxd-OBn (1.0 eq) and Pd/C (10% w/w) in CH<sub>3</sub>OH (concentration of the first reagent is 10 mg/mL) for 2 h at r.t. under H<sub>2</sub> atmosphere.

## Characterization of compounds F0, F1 and F2

### Boc-D-Phe-L-Oxd-OH, F0

Characterisation matched literature values. See ref. [1].

### Boc-D-F<sub>1</sub>Phe-L-Oxd-OH, F1

The product **F1** is obtained as a white solid with an 87% yield. M.p. = 172-178°C;  $[\alpha]_{\text{D}}^{25} = -32.2^\circ$  ( $c = 0.5$  in CH<sub>3</sub>OH); IR (ATR-IR):  $\nu$  3370, 3364, 2984, 2937, 1778, 1720, 1687, 1603, 1510 cm<sup>-1</sup>; <sup>1</sup>H NMR (CD<sub>3</sub>OD, 400 MHz):  $\delta$  1.31 (9H, s, CH<sub>3</sub> *t*-Bu), 1.47 (3H, d,  $J = 6.4$  Hz, CH<sub>3</sub> Oxd), 2.71 (1H, dd,  $J = 10.0, 13.2$  Hz, CH benzyl), 3.10 (1H, m, CH benzyl), 4.41 (1H, d,  $J = 3.6$  Hz, C $\alpha$ H Oxd), 4.69 (1H, m, C $\beta$ H Oxd), 5.63 (1H, dd,  $J = 4.0, 9.6$  Hz, C $\alpha$ H F-Phe), 6.97 (2H, m, CH Ar), 7.30 (2H, m, CH Ar); <sup>13</sup>C (CD<sub>3</sub>OD<sub>3</sub>, 100 MHz):  $\delta$  19.77, 27.18, 37.19, 54.37, 61.92, 74.57, 79.04, 114.32, 114.53, 130.85, 130.93, 132.88, 152.28, 155.89, 163.07, 170.04, 172.44; <sup>19</sup>F NMR (CD<sub>3</sub>OD, 376.5 MHz):  $\delta$  -118.63, -118.46.

### Boc-D-F<sub>2</sub>Phe-L-Oxd-OH, F0

Characterisation matched literature values. See ref. [2].

## References

1. Milli, L.; Castellucci, N.; Tomasini, C. Turning around the L-Phe-D-oxd moiety for a versatile low-molecular-weight gelator. *European J. Org. Chem.* **2014**, 2014, 5954–5961, doi:10.1002/ejoc.201402787.
2. Ravarino, P.; Giuri, D.; Faccio, D.; Tomasini, C. Designing a transparent and fluorine containing hydrogel. *Gels* **2021**, 7, 1–10, doi:10.3390/gels7020043.

$^1\text{H}$  NMR spectrum of compound **F1**, acquired in  $\text{CD}_3\text{OD}$

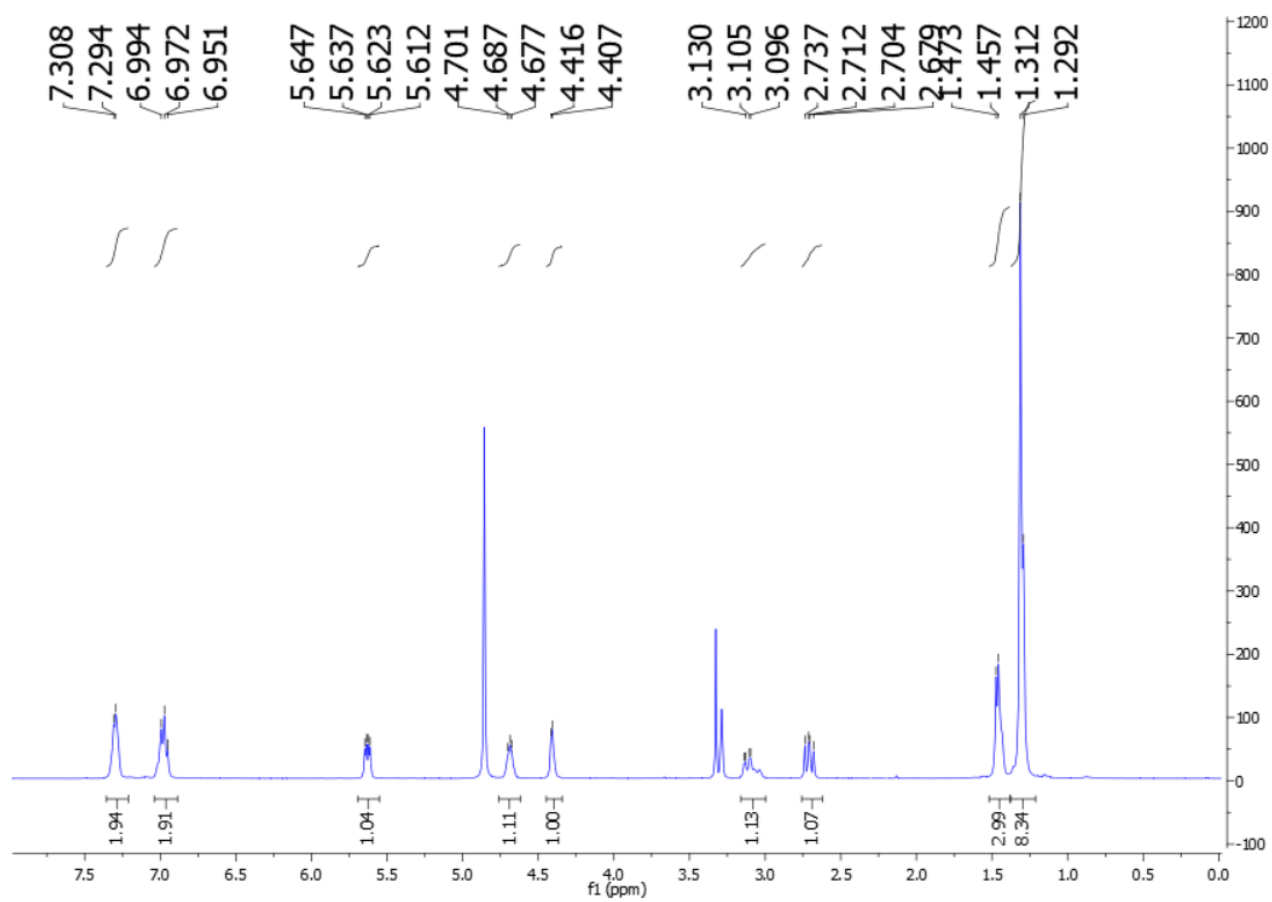

COSY NMR spectrum of compound **F1**, acquired in CD<sub>3</sub>OD

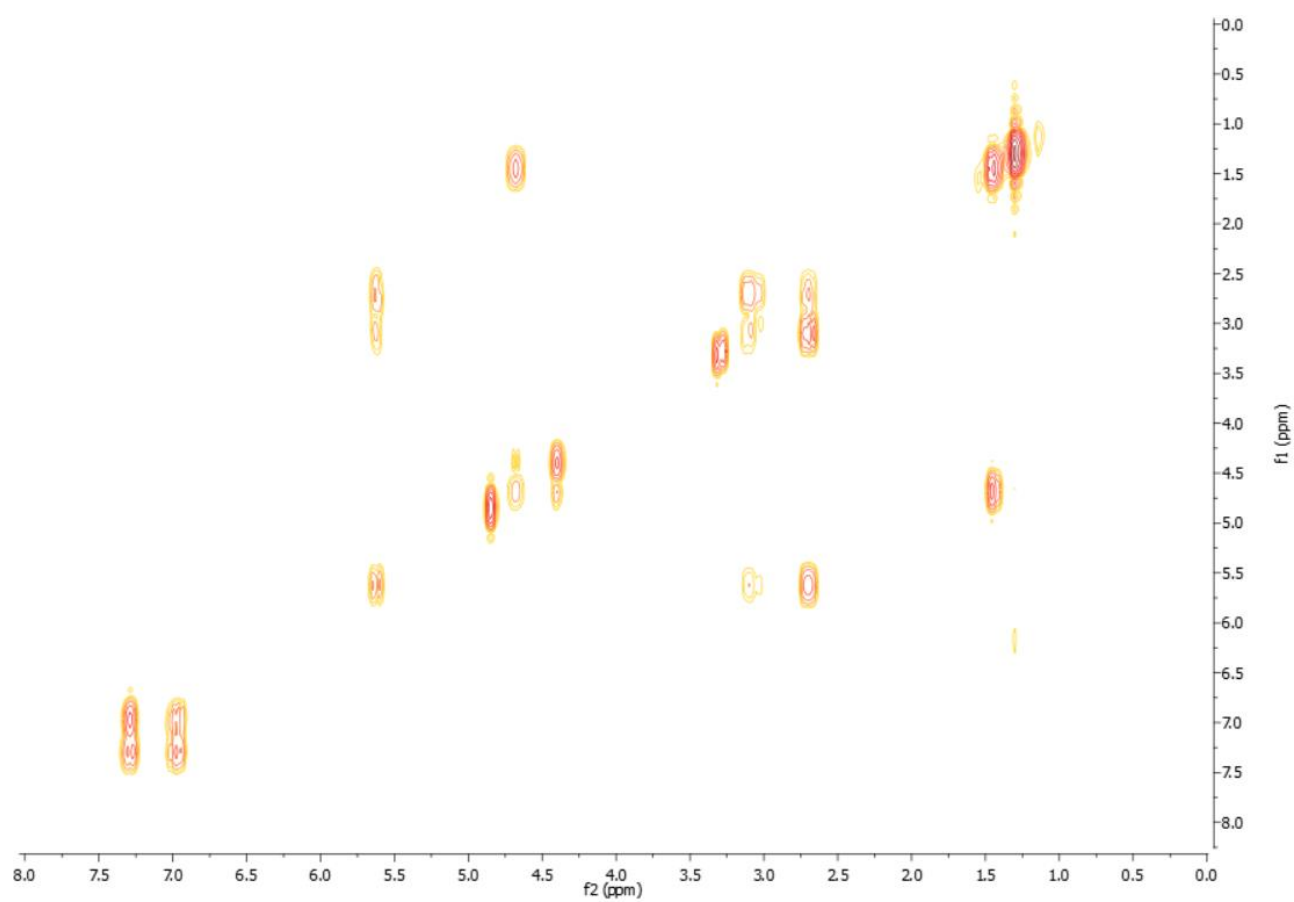

$^{13}\text{C}$  NMR spectrum of compound F1, acquired in  $\text{CD}_3\text{OD}$ .

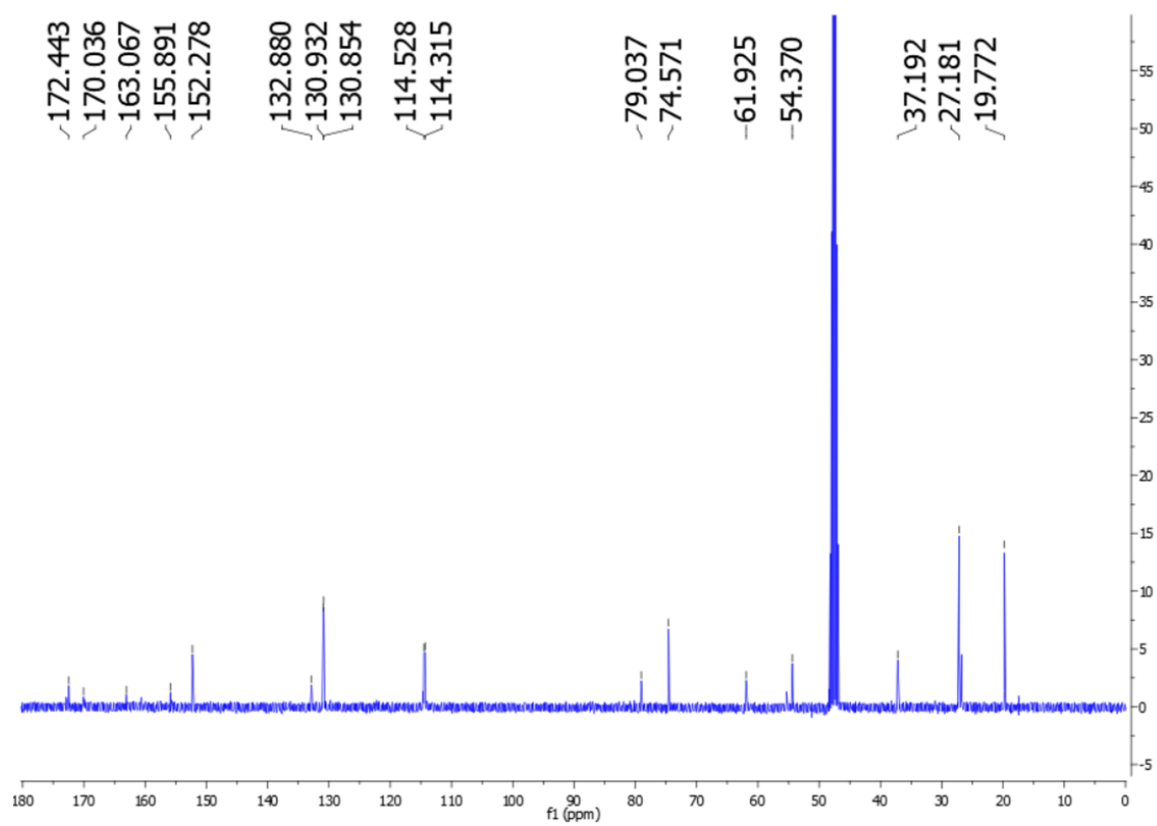

$^{19}\text{F}$  NMR spectrum of compound **F1**, acquired in  $\text{CD}_3\text{OD}$

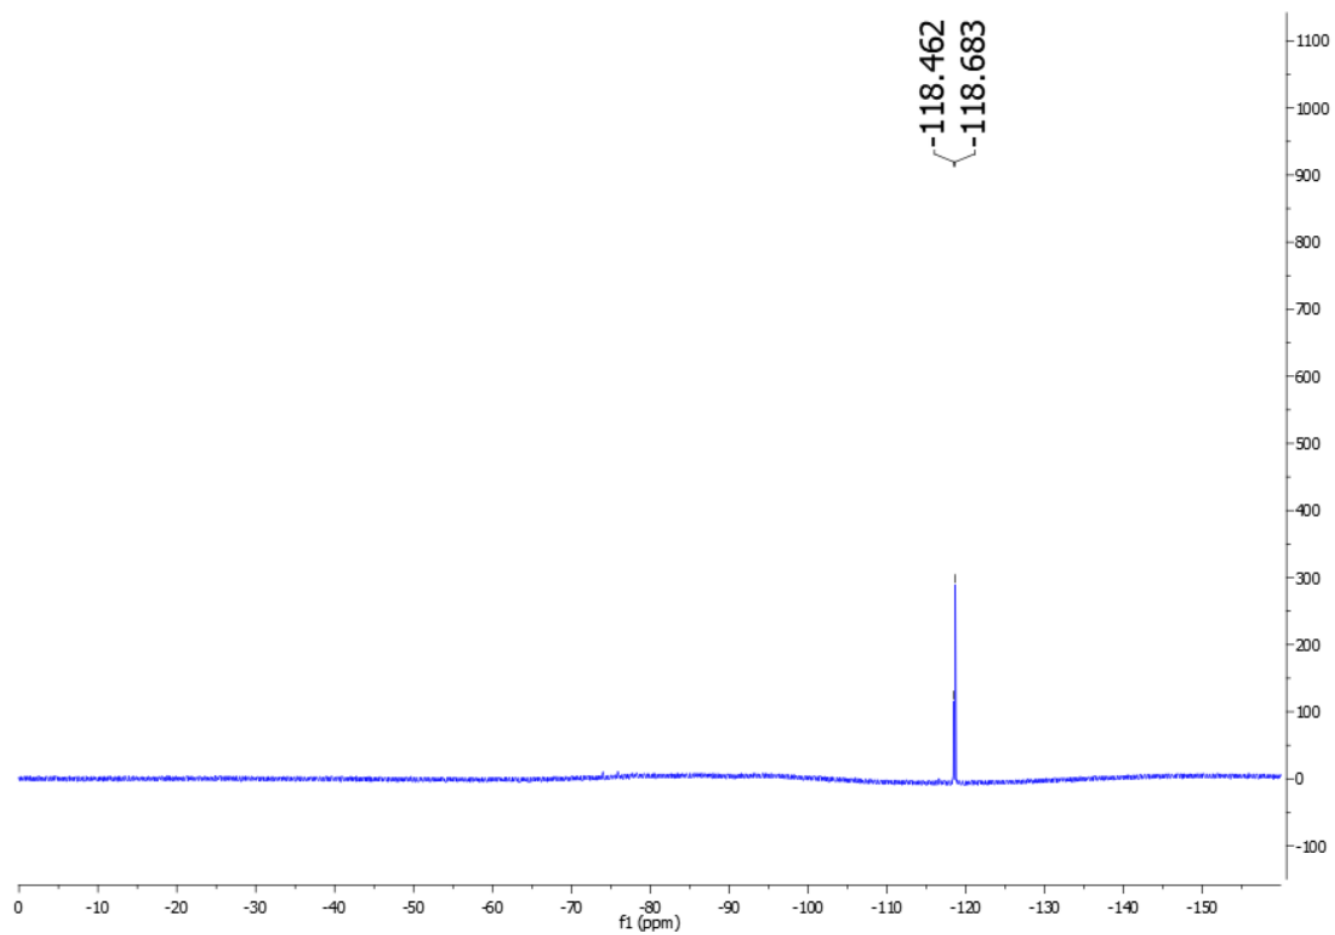

ATR-IR spectrum of compound F1

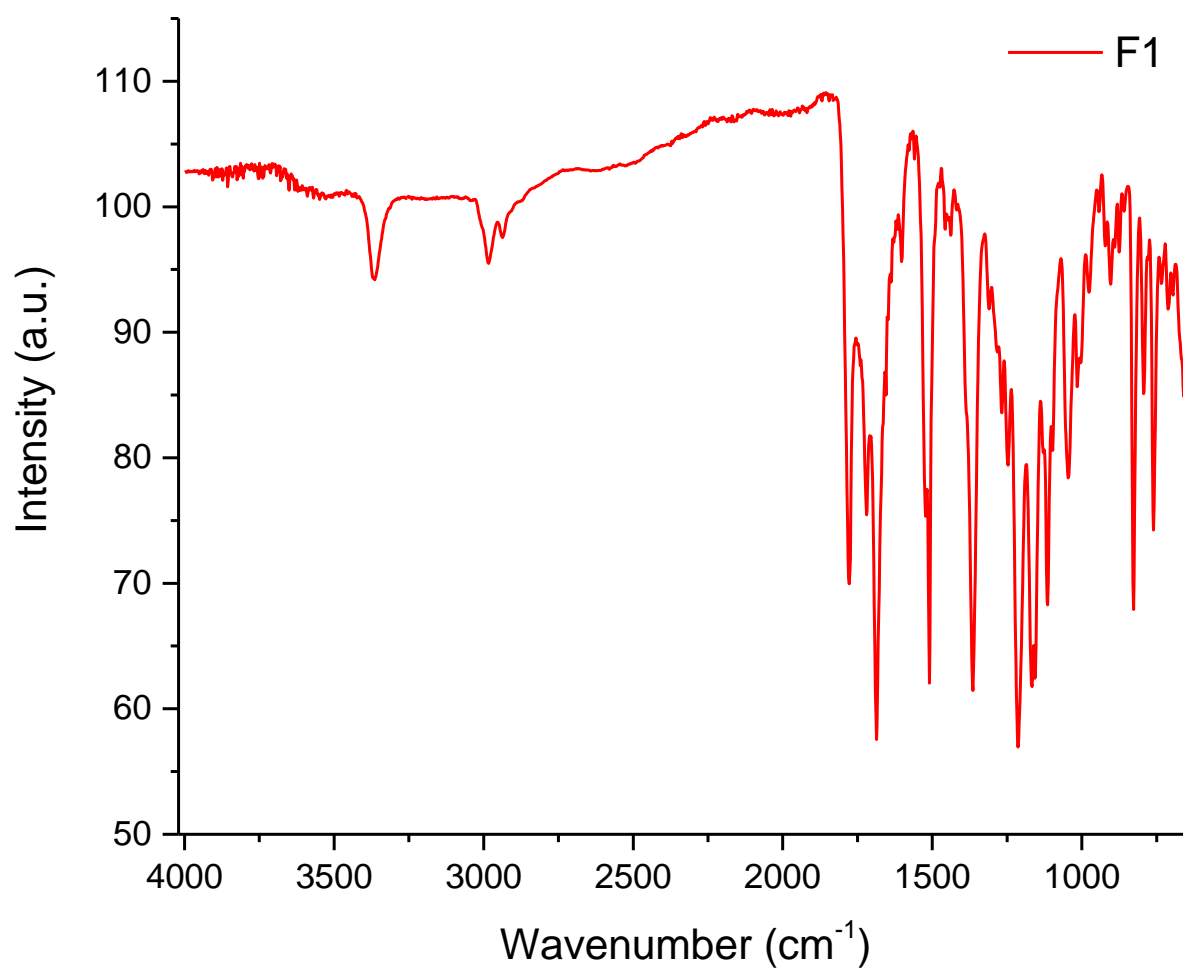

**Table S1.** Detailed list of the samples prepared with the solvent switch method

| Entry | Conc. | Gelator | Solvent     | Trigger     | Outcome | Recovery |
|-------|-------|---------|-------------|-------------|---------|----------|
| 1     | 0.5%  | F0      | EtOH (30%)  | Water (70%) | G       | G        |
| 2     | 0.5%  | F0      | EtOH (50%)  | Water (50%) | S       | /        |
| 3     | 0.5%  | F0      | EtOH (70%)  | Water (30%) | S       | /        |
| 4     | 0.5%  | F1      | EtOH (30%)  | Water (70%) | G       | G        |
| 5     | 0.5%  | F1      | EtOH (50%)  | Water (50%) | S       | /        |
| 6     | 0.5%  | F1      | EtOH (70%)  | Water (30%) | S       | /        |
| 7     | 0.5%  | F2      | EtOH (30%)  | Water (70%) | G       | G        |
| 8     | 0.5%  | F2      | EtOH (50%)  | Water (50%) | S       | /        |
| 9     | 0.5%  | F2      | EtOH (70%)  | Water (30%) | S       | /        |
| 10    | 0.5%  | F0      | iPrOH (30%) | Water (70%) | S       | /        |
| 11    | 0.5%  | F0      | iPrOH (50%) | Water (50%) | S       | /        |
| 12    | 0.5%  | F0      | iPrOH (70%) | Water (30%) | S       | /        |
| 13    | 0.5%  | F1      | iPrOH (30%) | Water (70%) | G       | VS       |
| 14    | 0.5%  | F1      | iPrOH (50%) | Water (50%) | S       | /        |
| 15    | 0.5%  | F1      | iPrOH (70%) | Water (30%) | S       | /        |
| 16    | 0.5%  | F2      | iPrOH (30%) | Water (70%) | G       | VS       |
| 17    | 0.5%  | F2      | iPrOH (50%) | Water (50%) | S       | /        |
| 18    | 0.5%  | F2      | iPrOH (70%) | Water (30%) | S       | /        |
| 19    | 1.0%  | F0      | EtOH (30%)  | Water (70%) | G       | G        |
| 20    | 1.0%  | F0      | EtOH (50%)  | Water (50%) | S       | /        |
| 21    | 1.0%  | F0      | EtOH (70%)  | Water (30%) | S       | /        |
| 22    | 1.0%  | F1      | EtOH (30%)  | Water (70%) | G       | G        |
| 23    | 1.0%  | F1      | EtOH (50%)  | Water (50%) | S       | /        |
| 24    | 1.0%  | F1      | EtOH (70%)  | Water (30%) | S       | /        |
| 25    | 1.0%  | F2      | EtOH (30%)  | Water (70%) | G       | G        |
| 26    | 1.0%  | F2      | EtOH (50%)  | Water (50%) | S       | /        |
| 27    | 1.0%  | F2      | EtOH (70%)  | Water (30%) | S       | /        |
| 28    | 1.0%  | F0      | iPrOH (30%) | Water (70%) | G       | G        |
| 29    | 1.0%  | F0      | iPrOH (50%) | Water (50%) | S       | /        |
| 30    | 1.0%  | F0      | iPrOH (70%) | Water (30%) | S       | /        |
| 31    | 1.0%  | F1      | iPrOH (30%) | Water (70%) | G       | G        |
| 32    | 1.0%  | F1      | iPrOH (50%) | Water (50%) | P       | /        |
| 33    | 1.0%  | F1      | iPrOH (70%) | Water (30%) | S       | /        |
| 34    | 1.0%  | F2      | iPrOH (30%) | Water (70%) | G       | G        |
| 35    | 1.0%  | F2      | iPrOH (50%) | Water (50%) | S       | /        |
| 36    | 1.0%  | F2      | iPrOH (70%) | Water (30%) | S       | /        |

G = gel; S = solution; VS = viscous solution; P = precipitate

**Table S2.** Detailed list of the samples prepared with the pH change method and the addition of calcium chloride

| Entry | Methodology | Conc. | Gelator   | Solvent <sup>a</sup> | Trigger (eq)            | Outcome | pH  | Recovery |
|-------|-------------|-------|-----------|----------------------|-------------------------|---------|-----|----------|
| 37    | <b>b</b>    | 0.5%  | <b>F0</b> | 0.03 M PBS           | GdL (1.4)               | G       | 3.8 | G        |
| 38    | <b>b</b>    | 0.5%  | <b>F1</b> | 0.03 M PBS           | GdL (1.4)               | G       | 3.9 | G        |
| 39    | <b>b</b>    | 0.5%  | <b>F2</b> | 0.03 M PBS           | GdL (1.4)               | G       | 4.2 | G        |
| 40    | <b>c</b>    | 0.5%  | <b>F0</b> | 0.03 M PBS           | CaCl <sub>2</sub> (1.0) | PG      | /   | /        |
| 41    | <b>c</b>    | 0.5%  | <b>F1</b> | 0.03 M PBS           | CaCl <sub>2</sub> (1.0) | G       | 4.4 | PG       |
| 42    | <b>c</b>    | 0.5%  | <b>F2</b> | 0.03 M PBS           | CaCl <sub>2</sub> (1.0) | G       | 4.6 | PG       |
| 43    | <b>b</b>    | 1.0%  | <b>F0</b> | 0.06 M PBS           | GdL (1.4)               | G       | 3.6 | G        |
| 44    | <b>b</b>    | 1.0%  | <b>F1</b> | 0.06 M PBS           | GdL (1.4)               | G       | 3.7 | G        |
| 45    | <b>b</b>    | 1.0%  | <b>F2</b> | 0.06 M PBS           | GdL (1.4)               | G       | 3.8 | G        |
| 46    | <b>c</b>    | 1.0%  | <b>F0</b> | 0.06 M PBS           | CaCl <sub>2</sub> (1.0) | G       | 4.5 | G        |
| 47    | <b>c</b>    | 1.0%  | <b>F1</b> | 0.06 M PBS           | CaCl <sub>2</sub> (1.0) | G       | 4.7 | G        |
| 48    | <b>c</b>    | 1.0%  | <b>F2</b> | 0.06 M PBS           | CaCl <sub>2</sub> (1.0) | G       | 4.8 | G        |

<sup>a</sup> Final concentration; G = gel; PG = partial gel

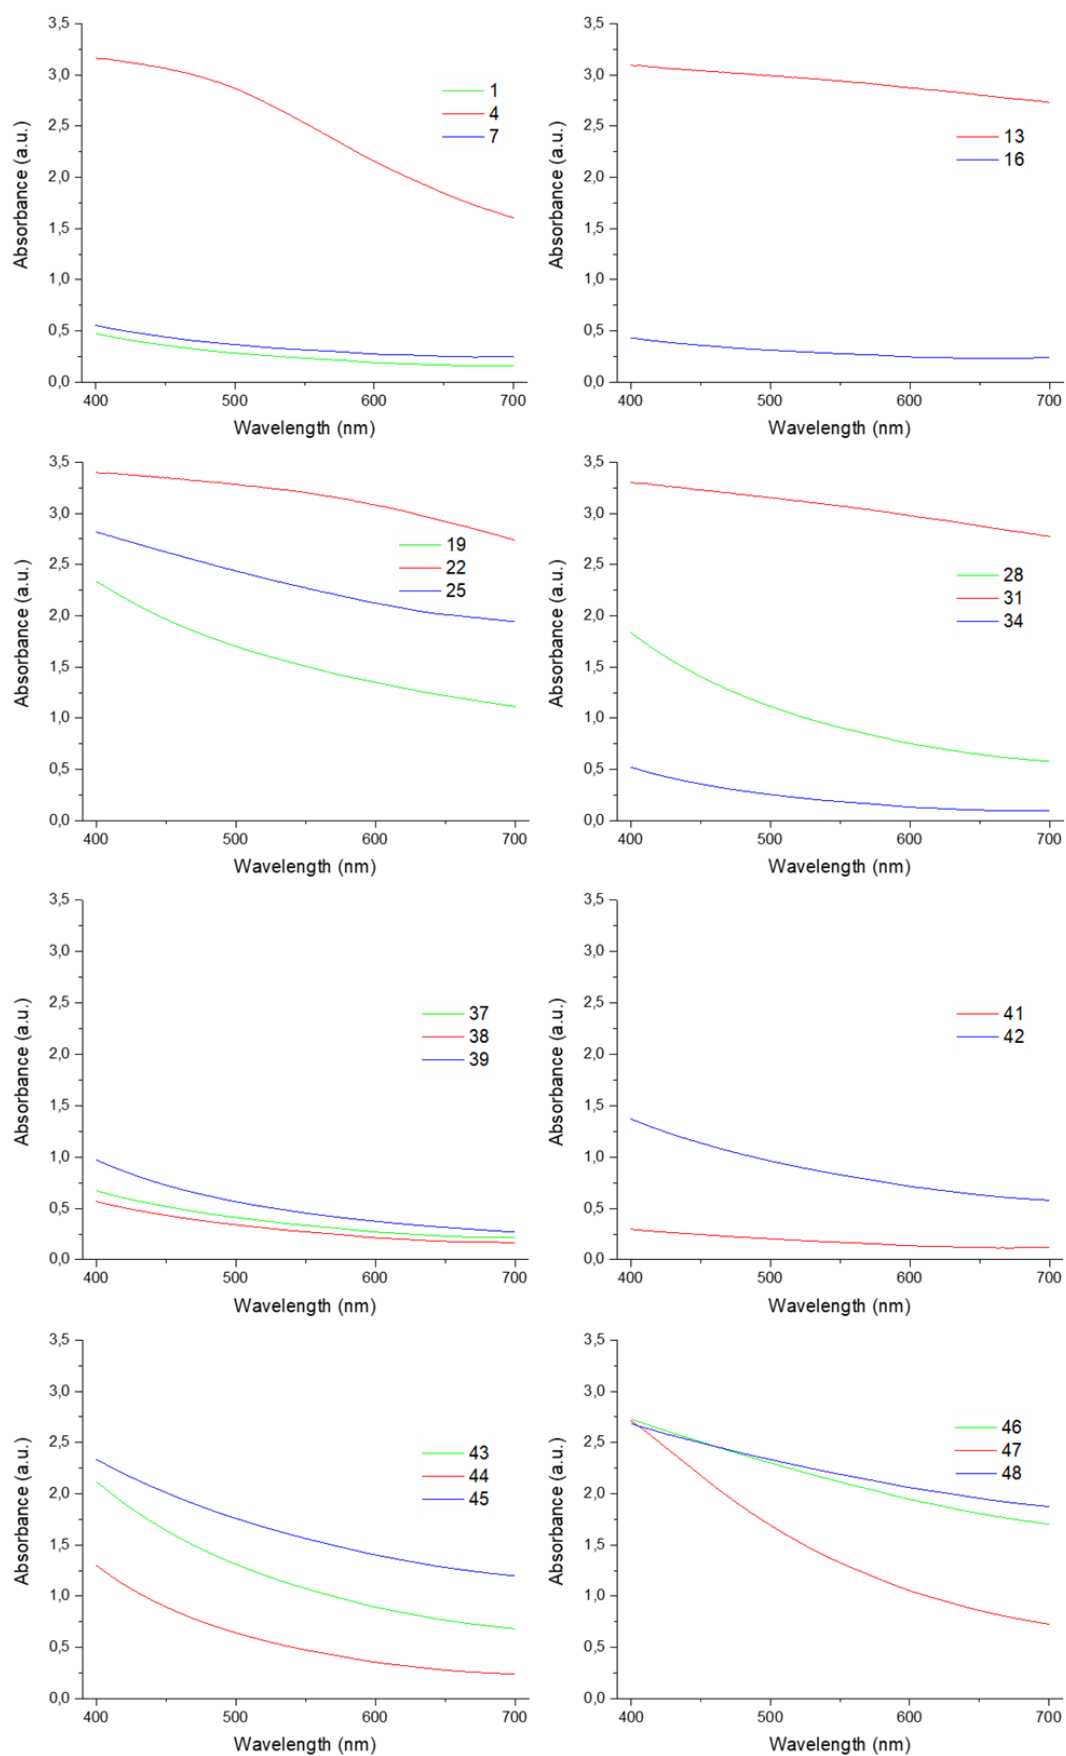

**Figure S1.** Absorbance spectra of the gels samples.

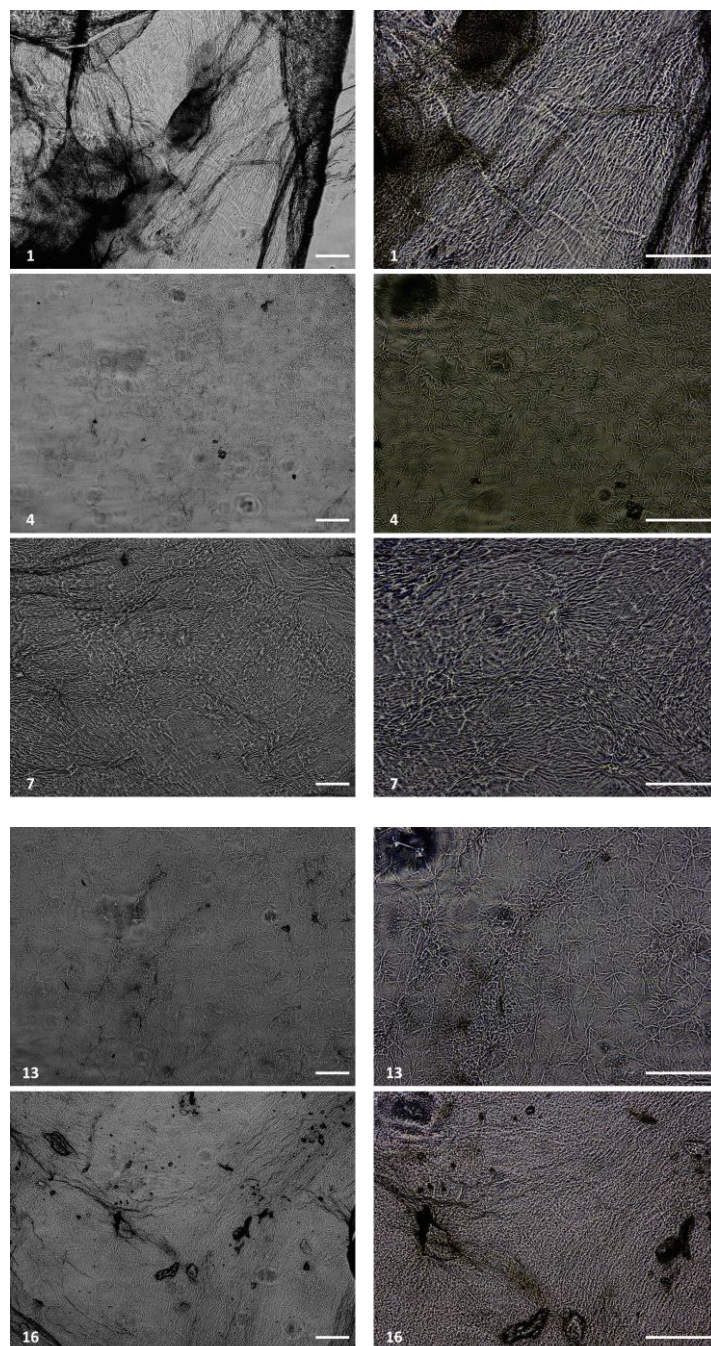

**Figure S2.** Morphology of the dried hydrogels **1, 4, 7, 13** and **16**, analysed through an optical microscope with different magnifications. Left: 10x magnification. Right: 20x magnification. For all the images the scalebar is 100  $\mu\text{m}$ .

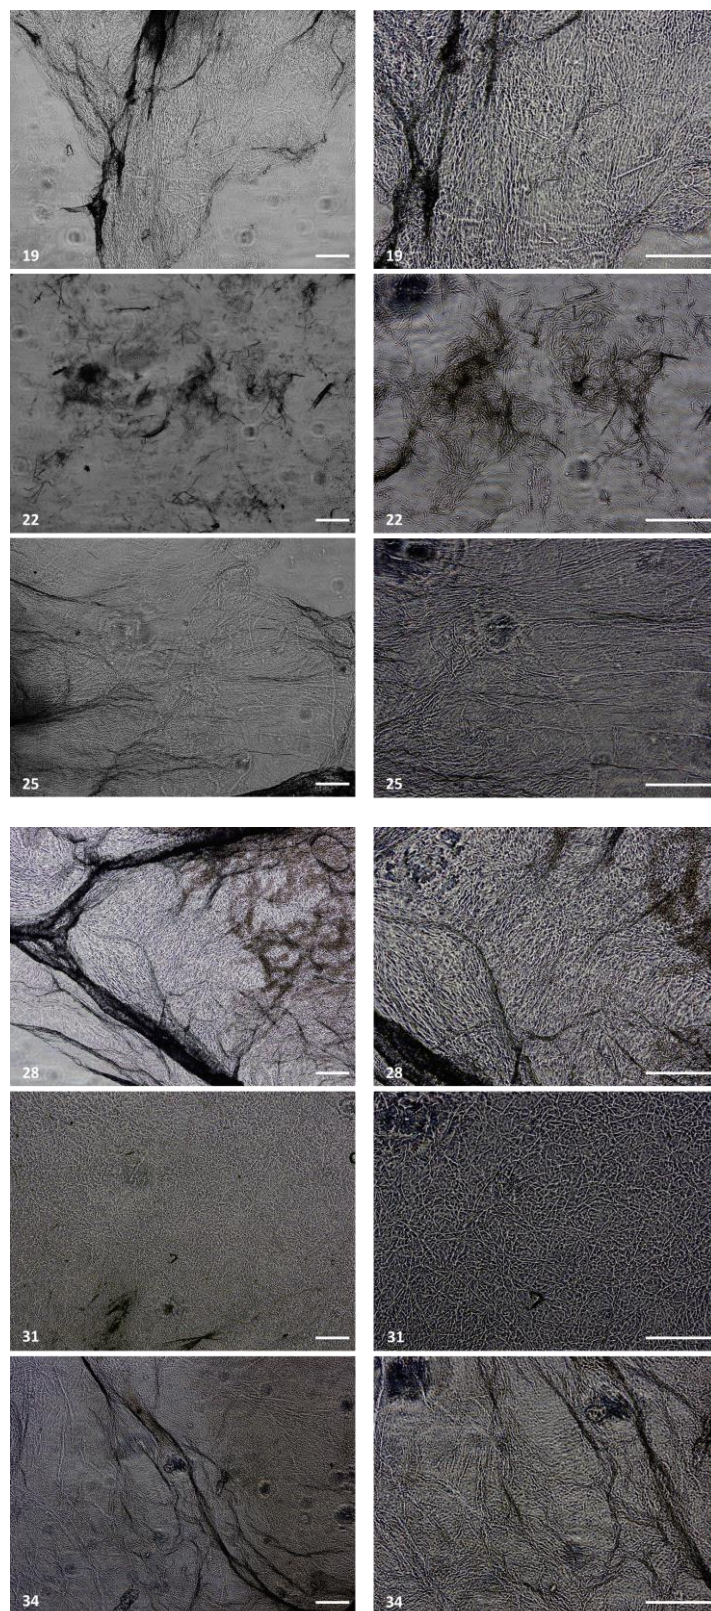

**Figure S3.** Morphology of the dried hydrogels **19, 22, 25, 28, 31** and **34**, analysed through an optical microscope with different magnifications. Left: 10x magnification. Right: 20x magnification. For all the images the scalebar is 100 μm.

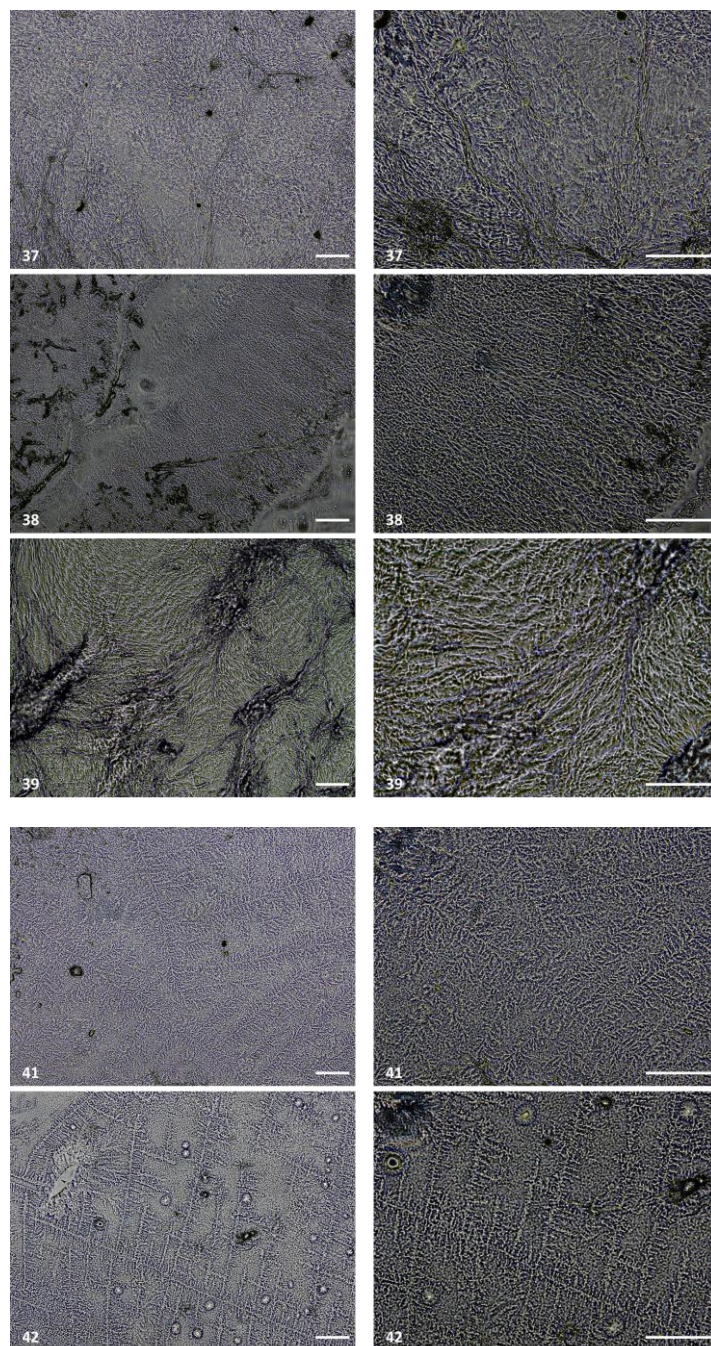

**Figure S4.** Morphology of the dried hydrogels 37, 38, 39, 41 and 42, analysed through an optical microscope with different magnifications. Left: 10x magnification. Right: 20x magnification. For all the images the scalebar is 100  $\mu\text{m}$ .

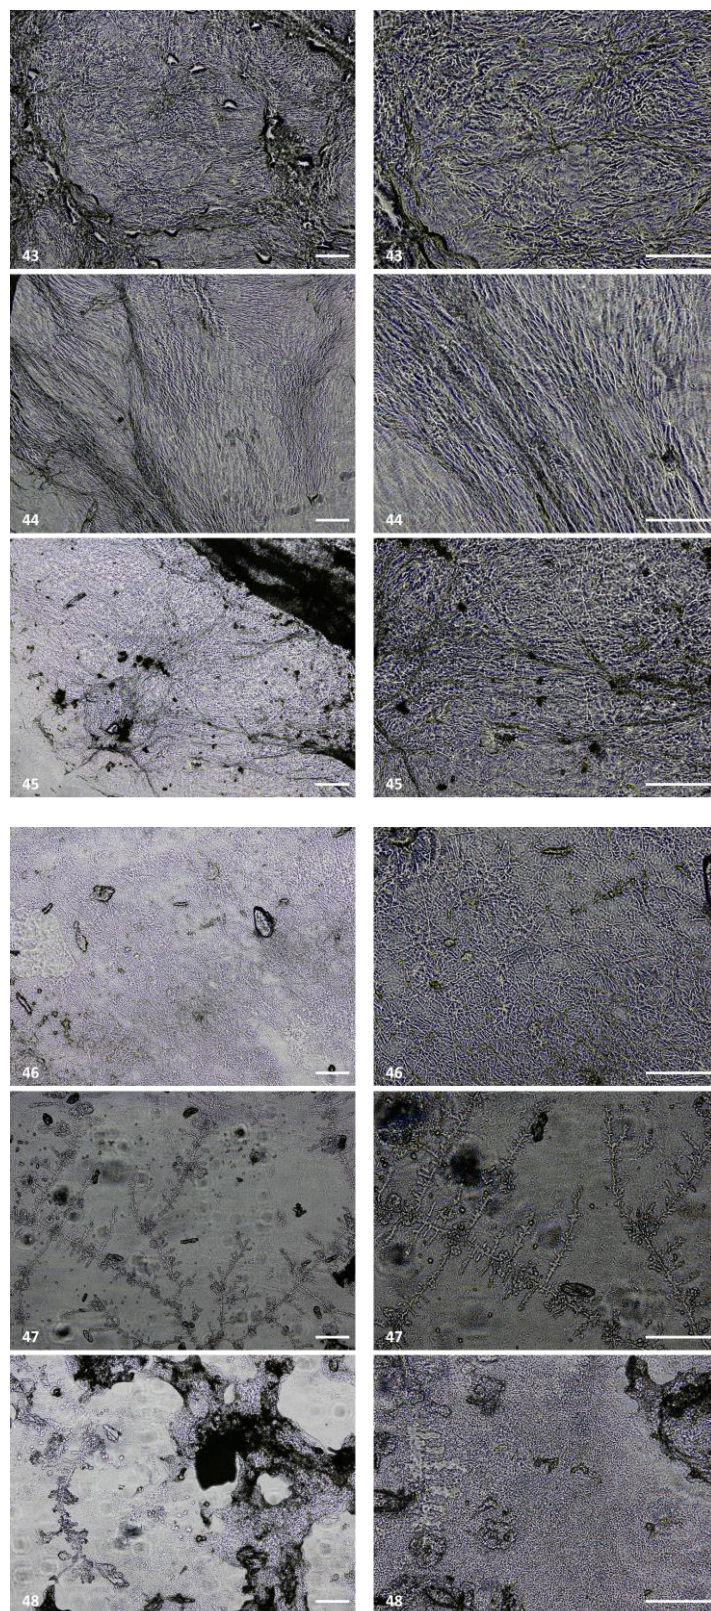

**Figure S5.** Morphology of the dried hydrogels **43**, **44**, **45**, **46**, **47** and **48**, analysed through an optical microscope with different magnifications. Left: 10x magnification. Right: 20x magnification. For all the images the scalebar is 100  $\mu\text{m}$ .

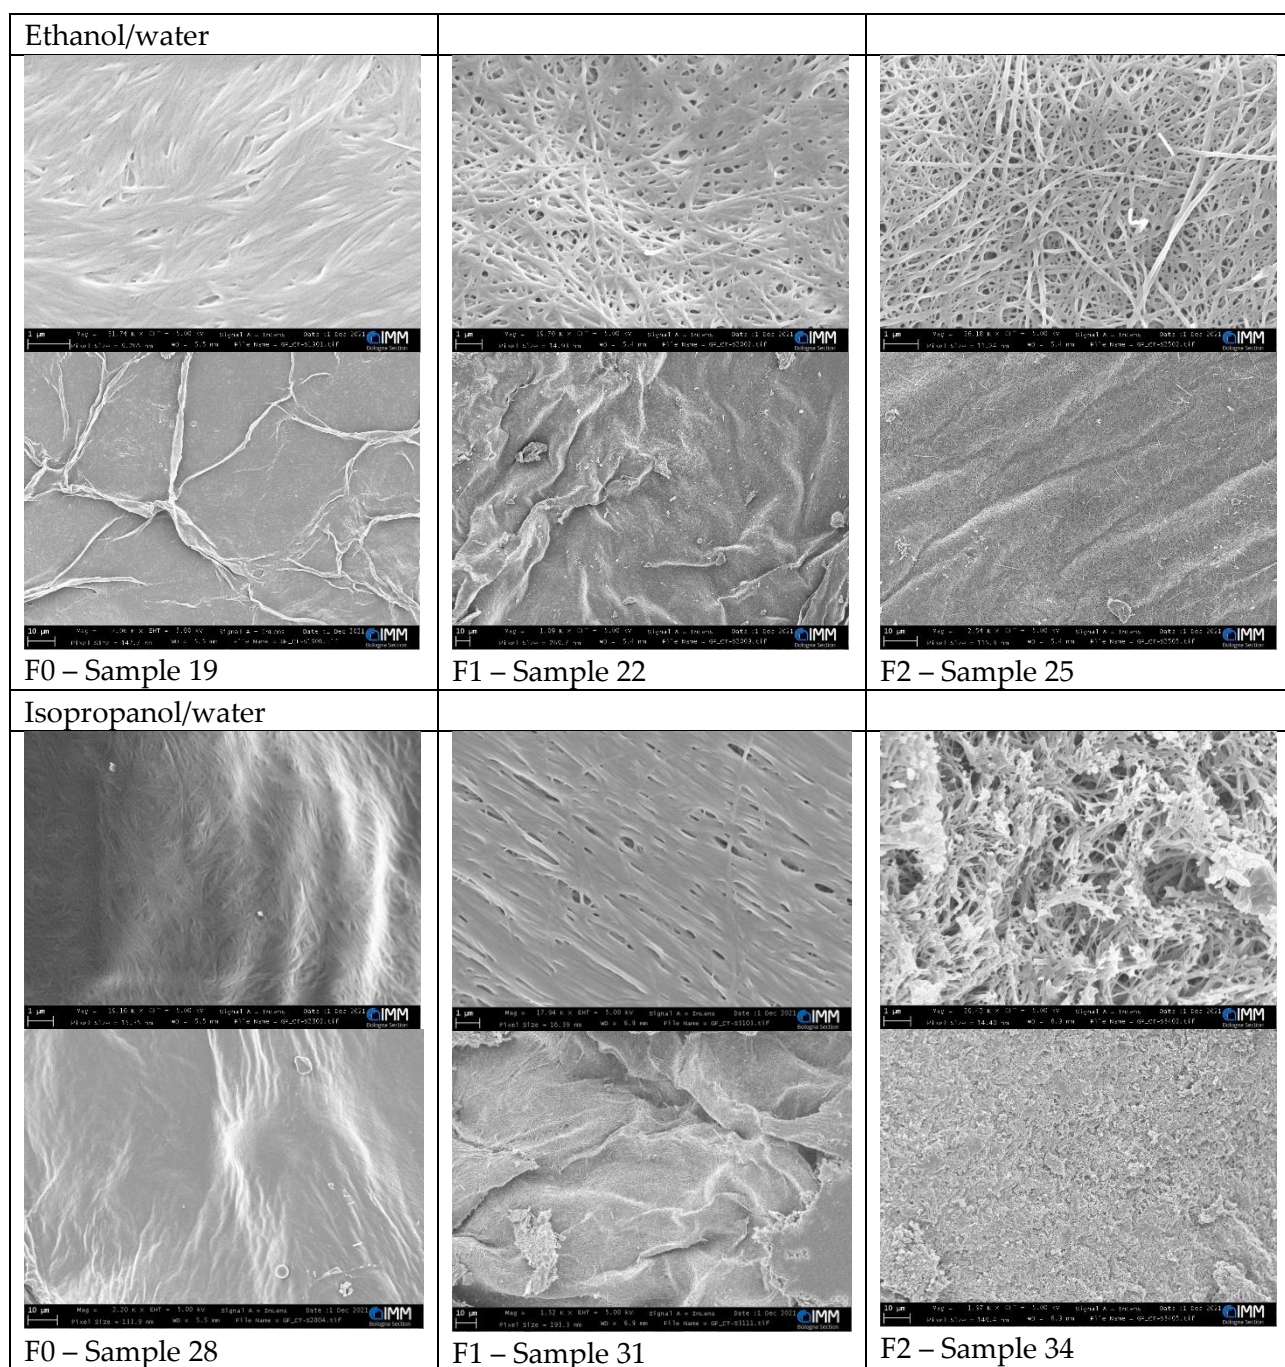

**Figure S6.** SEM images of the dried hydrogels 19, 22, 25, 28, 31 and 34.

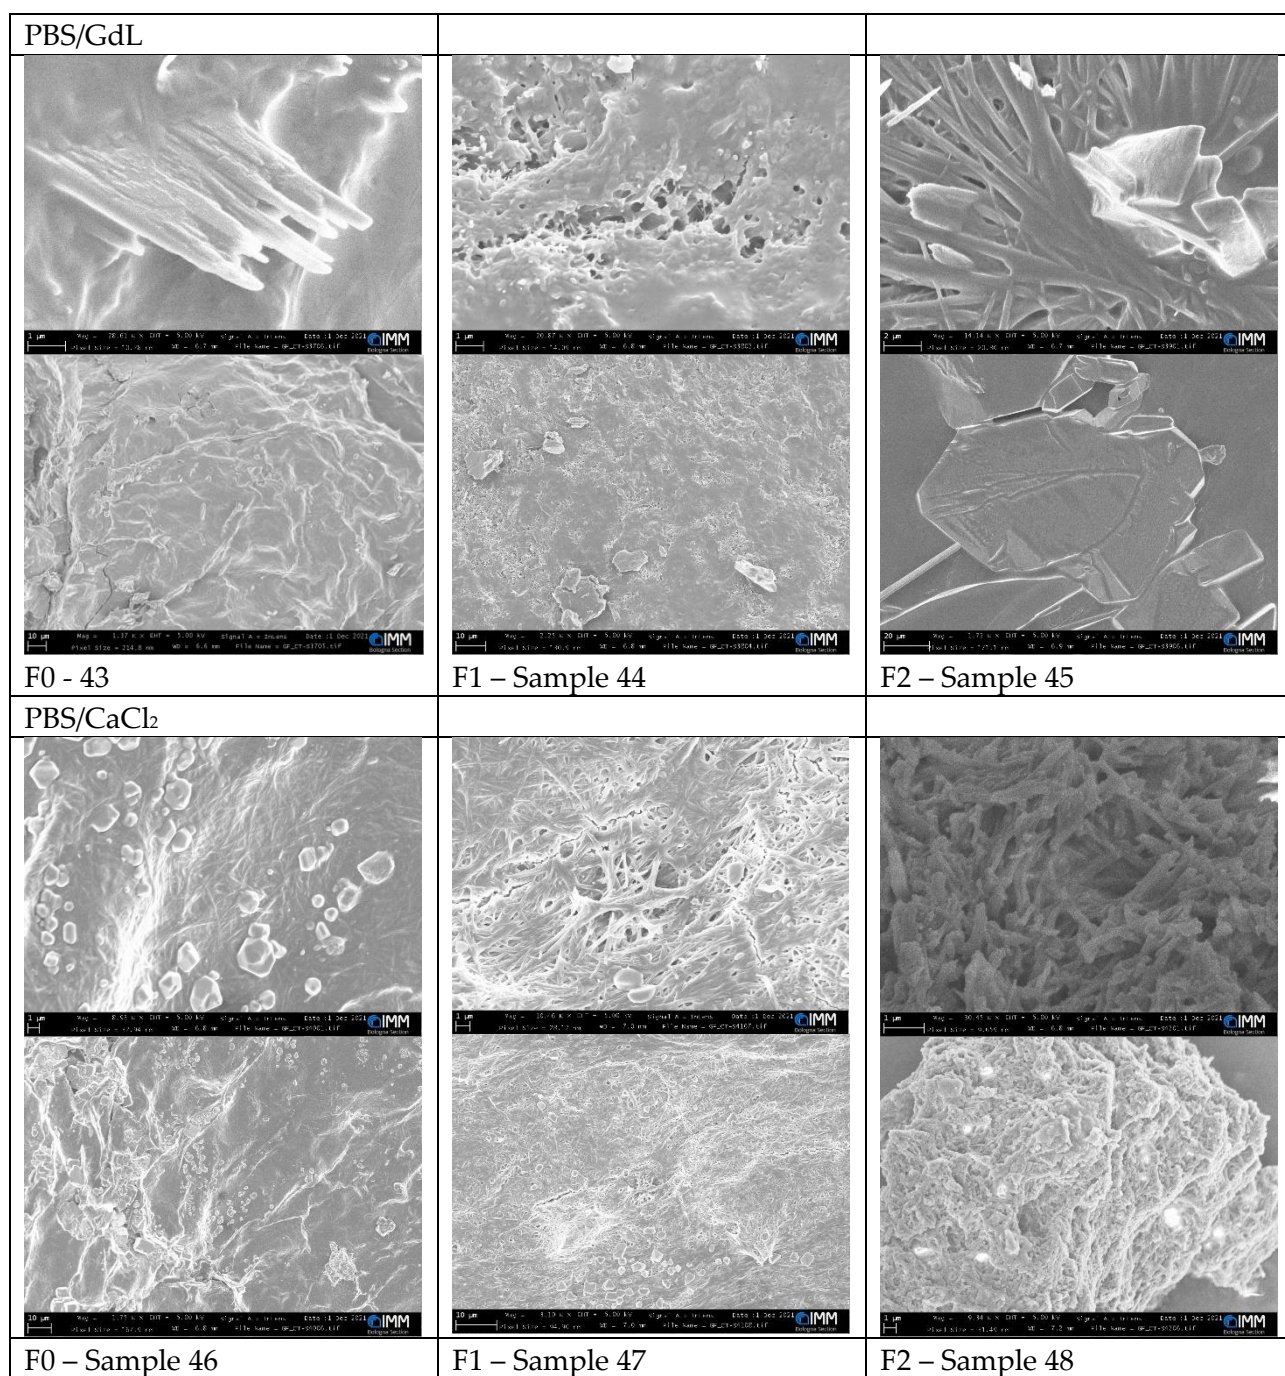

**Figure S7.** SEM images of the dried hydrogels **43-48**.

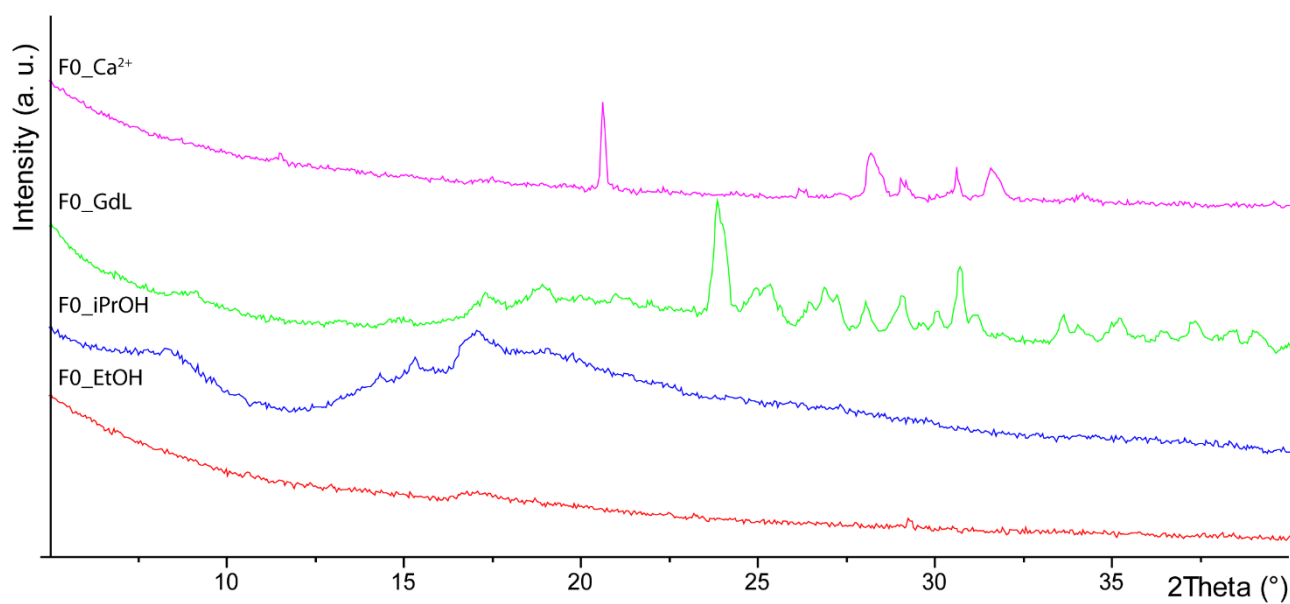

**Figure S8.** X-ray powder diffraction patterns of the xerogels from molecules F0 obtained from different chemical systems. F0\_EtOH, F0\_iPrOH, F0\_GdL, and F0\_Ca<sup>2+</sup> correspond to **19**, **28**, **37** and **40**, respectively.

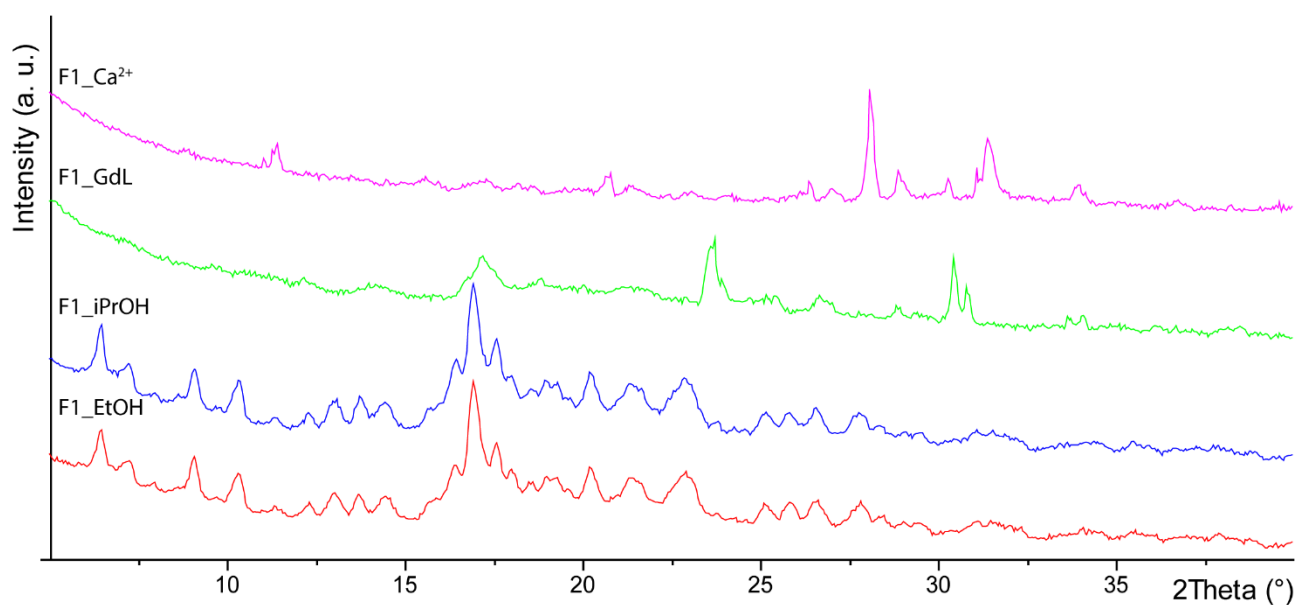

**Figure S9.** X-ray powder diffraction patterns of the xerogels from molecules F0 obtained from different chemical systems. F1\_EtOH, F1\_iPrOH, F1\_GdL, and F1\_Ca<sup>2+</sup> correspond to **22**, **31**, **38** and **41**, respectively.

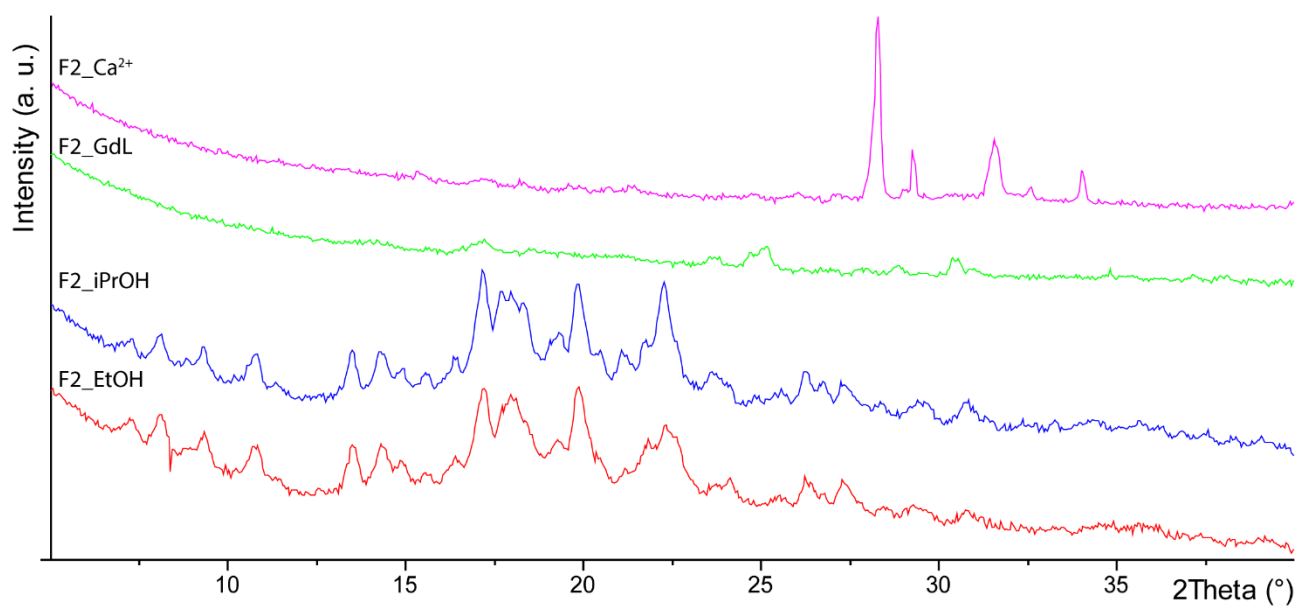

**Figure S10.** X-ray powder diffraction patterns of the xerogels from molecules F0 obtained from different chemical systems. F2\_EtOH, F2\_iPrOH, F2\_GdL, and F2\_Ca<sup>2+</sup> correspond to **25**, **34**, **39** and **42**, respectively.

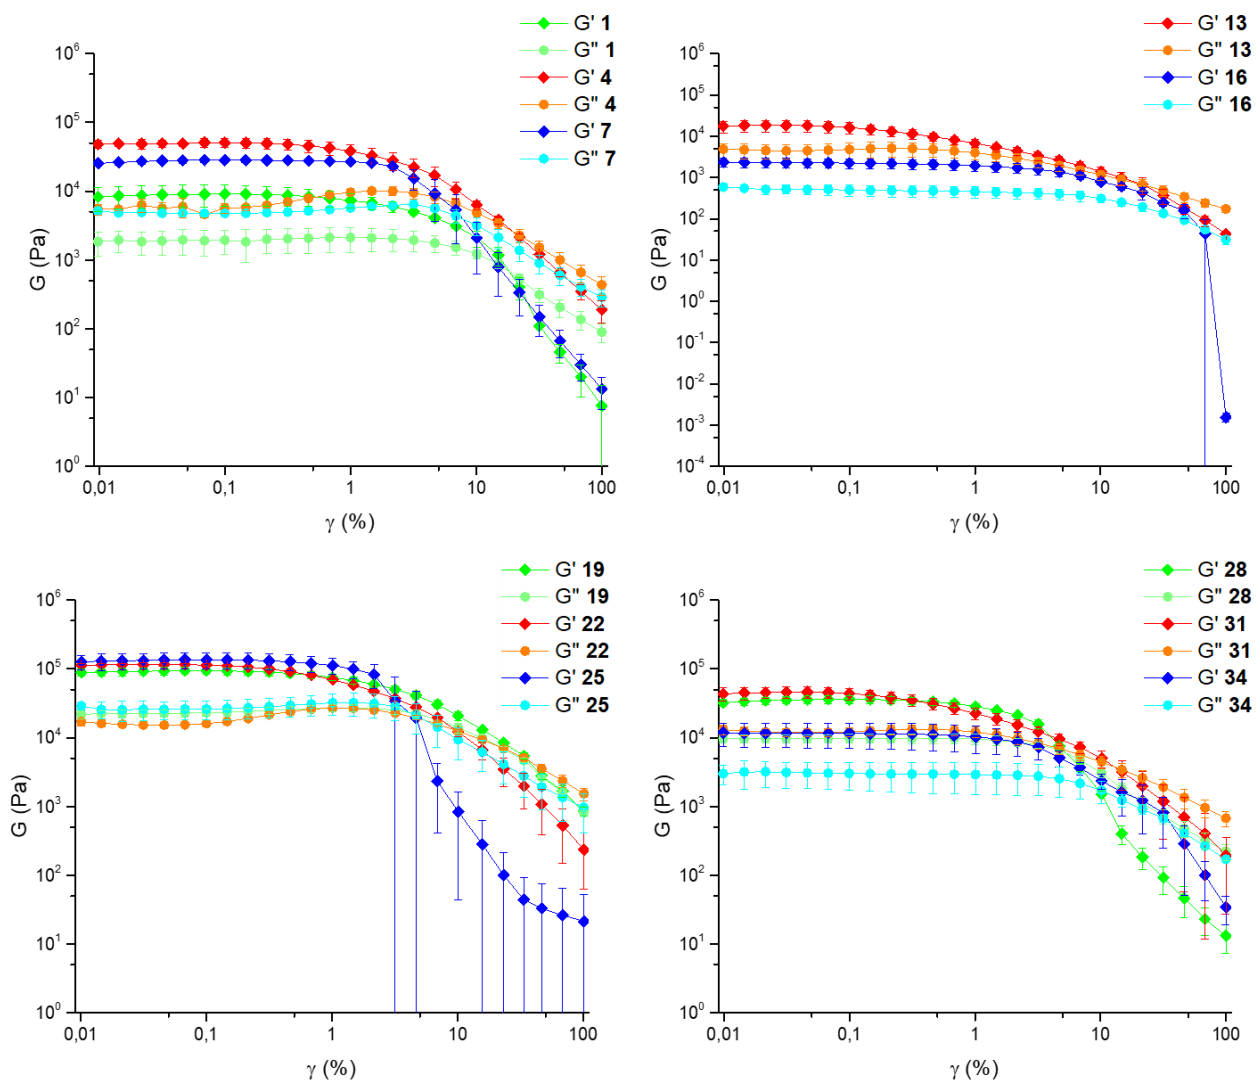

**Figure S11.** Amplitude sweep analysis of the samples 1, 4, 7, 13, 16, 19, 22, 25, 28, 31 and 34.

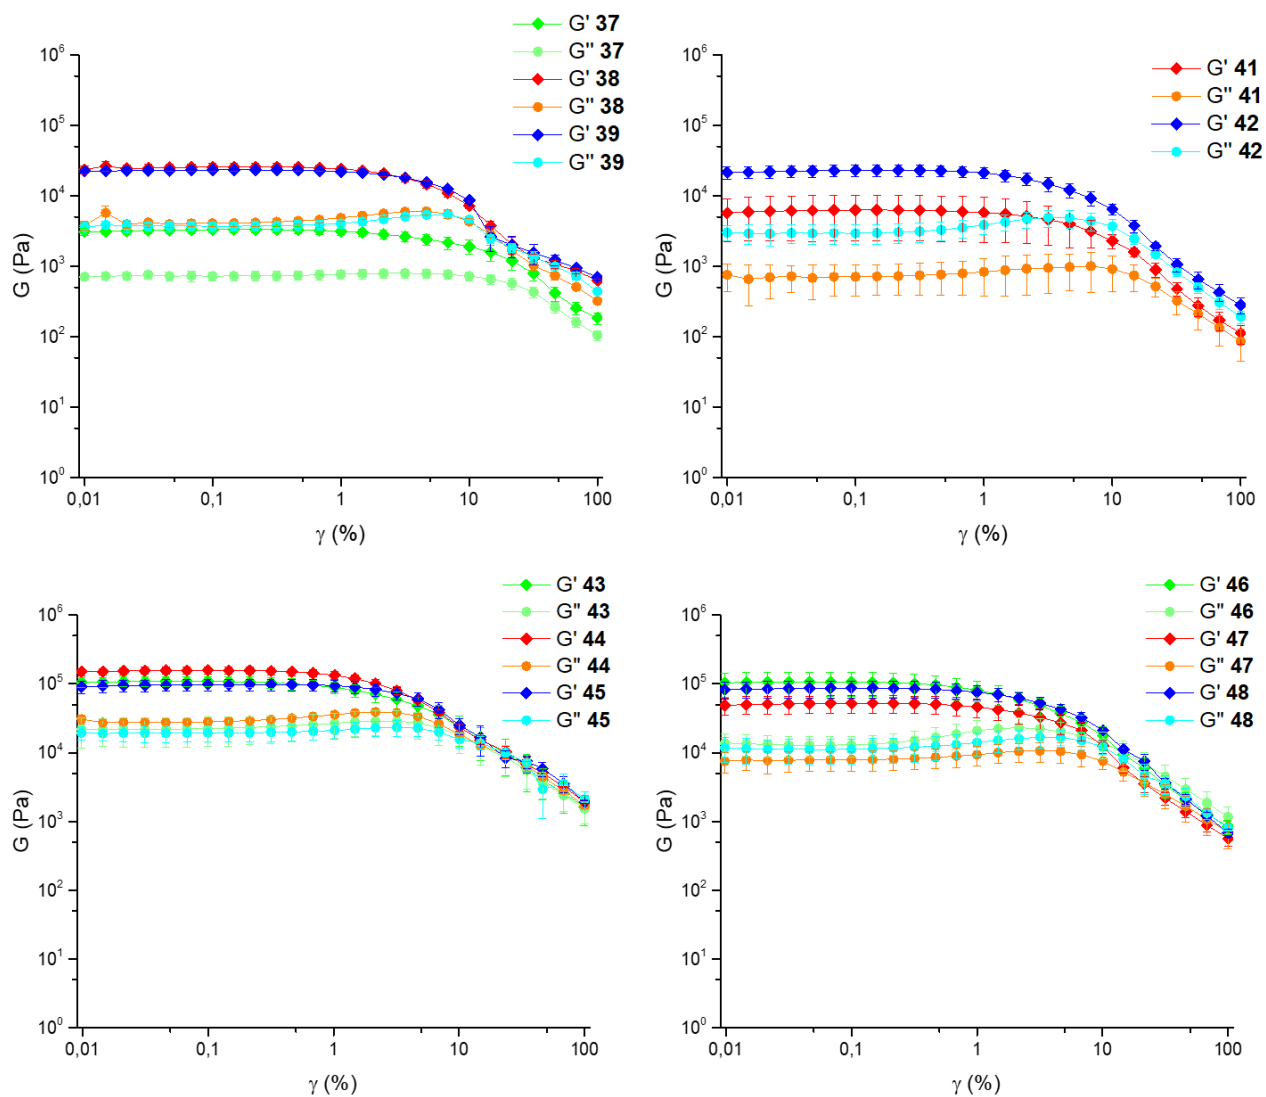

**Figure S12.** Amplitude sweep analysis of the samples 37, 38, 39 and 41-48.

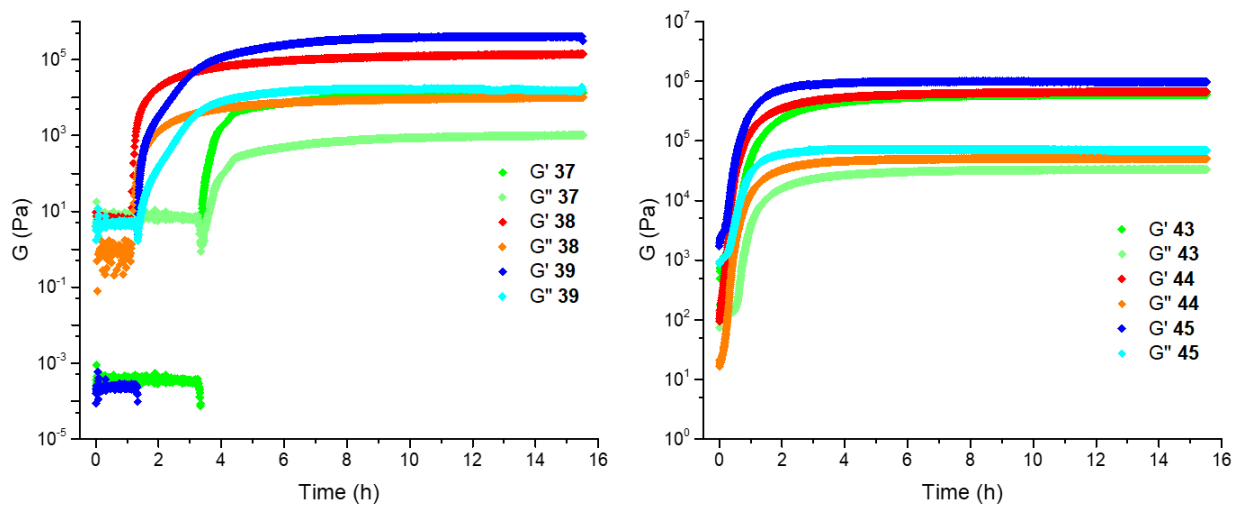

**Figure S13.** Time sweep analysis of the samples 37-39 and 43-45 obtained with the addition of GdL.

Table S3. Summary of the Properties of Gels

| Sample                 | Gelator | Conc. | Recovery | pH   | A ( $\lambda=630$ nm) | T (%) | G' (kPa) ( $\gamma = 0.068\%$ ) | G'' (kPa) ( $\gamma = 0.068\%$ ) |
|------------------------|---------|-------|----------|------|-----------------------|-------|---------------------------------|----------------------------------|
| EtOH/H <sub>2</sub> O  |         |       |          |      |                       |       |                                 |                                  |
| 1                      | F0      | 0.5   | yes      | n.a. | 0.17469               | 66.88 | 9.06 $\pm$ 3.27                 | 1.91 $\pm$ 0.77                  |
| 4                      | F1      | 0.5   | yes      | n.a. | 1.96473               | 1.08  | 51.18 $\pm$ 8.04                | 4.59 $\pm$ 0.54                  |
| 7                      | F2      | 0.5   | yes      | n.a. | 0.26185               | 54.72 | 28.29 $\pm$ 2.47                | 4.74 $\pm$ 0.32                  |
|                        |         |       |          |      |                       |       |                                 |                                  |
| 19                     | F0      | 1.0   | yes      | n.a. | 1.26706               | 5.41  | 93.79 $\pm$ 11.23               | 22.80 $\pm$ 2.73                 |
| 22                     | F1      | 1.0   | yes      | n.a. | 2.98876               | 0.10  | 114.96 $\pm$ 6.24               | 15.44 $\pm$ 1.17                 |
| 25                     | F2      | 1.0   | yes      | n.a. | 2.04926               | 0.89  | 135.93 $\pm$ 35.36              | 25.94 $\pm$ 7.91                 |
|                        |         |       |          |      |                       |       |                                 |                                  |
| iPrOH/H <sub>2</sub> O |         |       |          |      |                       |       |                                 |                                  |
| 13                     | F1      | 0.5   | no       | n.a. | 2.83436               | 0.15  | 17.26 $\pm$ 5.43                | 4.57 $\pm$ 1.79                  |
| 16                     | F2      | 0.5   | no       | n.a. | 0.23566               | 58.12 | 2.25 $\pm$ 0.58                 | 0.51 $\pm$ 0.15                  |
|                        |         |       |          |      |                       |       |                                 |                                  |
| 28                     | F0      | 1.0   | yes      | n.a. | 0.68608               | 20.60 | 36.07 $\pm$ 4.62                | 9.74 $\pm$ 1.36                  |
| 31                     | F1      | 1.0   | yes      | n.a. | 2.92284               | 0.12  | 45.29 $\pm$ 8.55                | 11.93 $\pm$ 1.71                 |
| 34                     | F2      | 1.0   | yes      | n.a. | 0.11273               | 77.14 | 11.61 $\pm$ 4.58                | 3.06 $\pm$ 1.30                  |
|                        |         |       |          |      |                       |       |                                 |                                  |
| PBS/GdL                |         |       |          |      |                       |       |                                 |                                  |
| 37                     | F0      | 0.5   | yes      | 3.8  | 0.24547               | 56.82 | 3.29 $\pm$ 0.35                 | 0.73 $\pm$ 0.12                  |
| 38                     | F1      | 0.5   | yes      | 3.9  | 0.19197               | 64.27 | 25.39 $\pm$ 3.00                | 4.06 $\pm$ 0.42                  |
| 39                     | F2      | 0.5   | yes      | 4.2  | 0.33574               | 46.16 | 23.15 $\pm$ 1.31                | 3.73 $\pm$ 0.57                  |
|                        |         |       |          |      |                       |       |                                 |                                  |
| 43                     | F0      | 1.0   | yes      | 3.6  | 0.8128                | 15.39 | 109.16 $\pm$ 18.09              | 22.21 $\pm$ 10.22                |
| 44                     | F1      | 1.0   | yes      | 3.7  | 0.30614               | 49.41 | 157.02 $\pm$ 18.62              | 27.78 $\pm$ 2.03                 |
| 45                     | F2      | 1.0   | yes      | 3.8  | 1.32719               | 4.71  | 97.00 $\pm$ 18.39               | 19.30 $\pm$ 5.16                 |
|                        |         |       |          |      |                       |       |                                 |                                  |
| PBS/Ca <sup>2+</sup>   |         |       |          |      |                       |       |                                 |                                  |
| 41                     | F1      | 0.5   | no       | 4.4  | 0.12512               | 74.97 | 6.23 $\pm$ 3.93                 | 0.71 $\pm$ 0.33                  |
| 42                     | F2      | 0.5   | no       | 4.6  | 0.66275               | 21.74 | 22.85 $\pm$ 4.27                | 2.94 $\pm$ 0.91                  |
|                        |         |       |          |      |                       |       |                                 |                                  |
| 46                     | F0      | 1.0   | yes      | 4.5  | 1.86026               | 1.38  | 106.98 $\pm$ 41.32              | 12.90 $\pm$ 4.31                 |
| 47                     | F1      | 1.0   | yes      | 4.7  | 0.93284               | 11.67 | 52.18 $\pm$ 14.65               | 7.83 $\pm$ 2.54                  |
| 48                     | F2      | 1.0   | yes      | 4.8  | 1.99850               | 1.00  | 86.82 $\pm$ 23.94               | 11.13 $\pm$ 4.39                 |
|                        |         |       |          |      |                       |       |                                 |                                  |

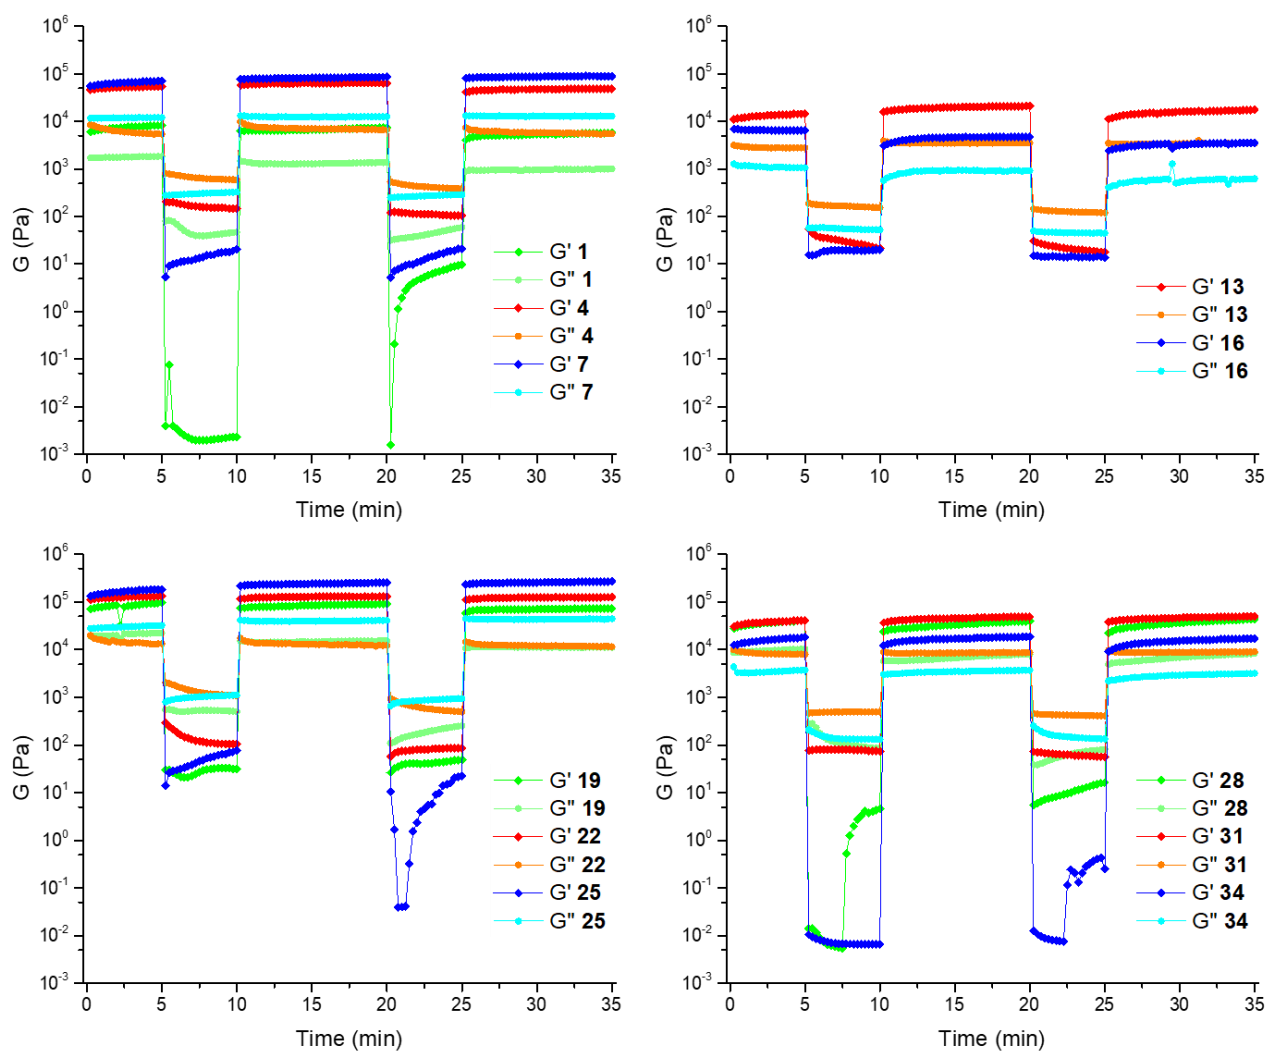

**Figure S14.** Thixotropic behaviour of the samples 1, 4, 7, 13, 16, 19, 22, 25, 28, 31 and 34 analysed with the rheometer.

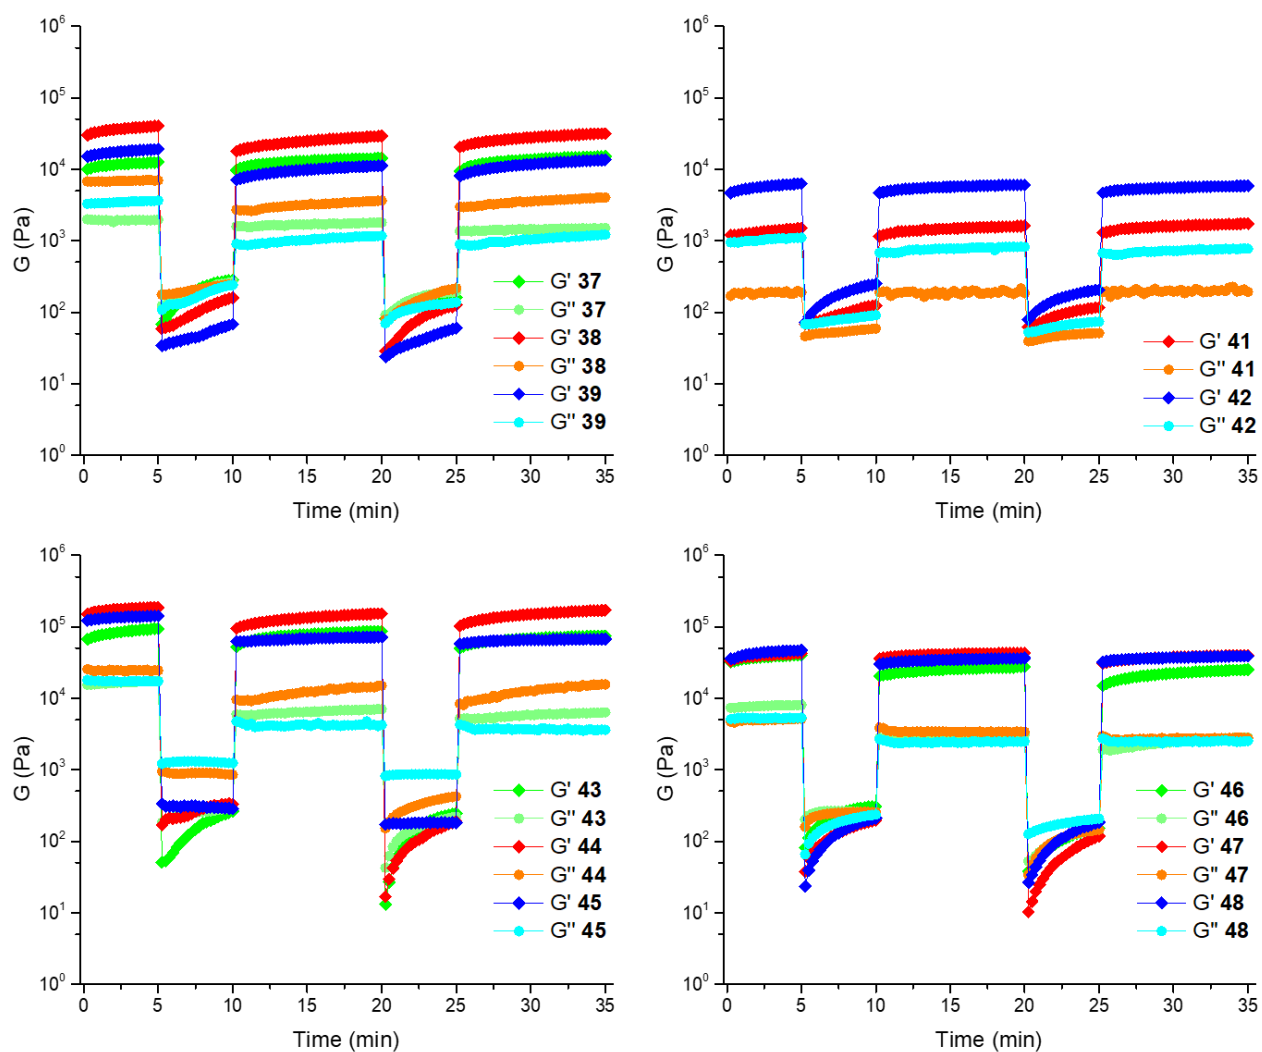

**Figure S15.** Thixotropic behaviour of the samples 37, 38, 39 and 41-48, analysed with the rheometer.

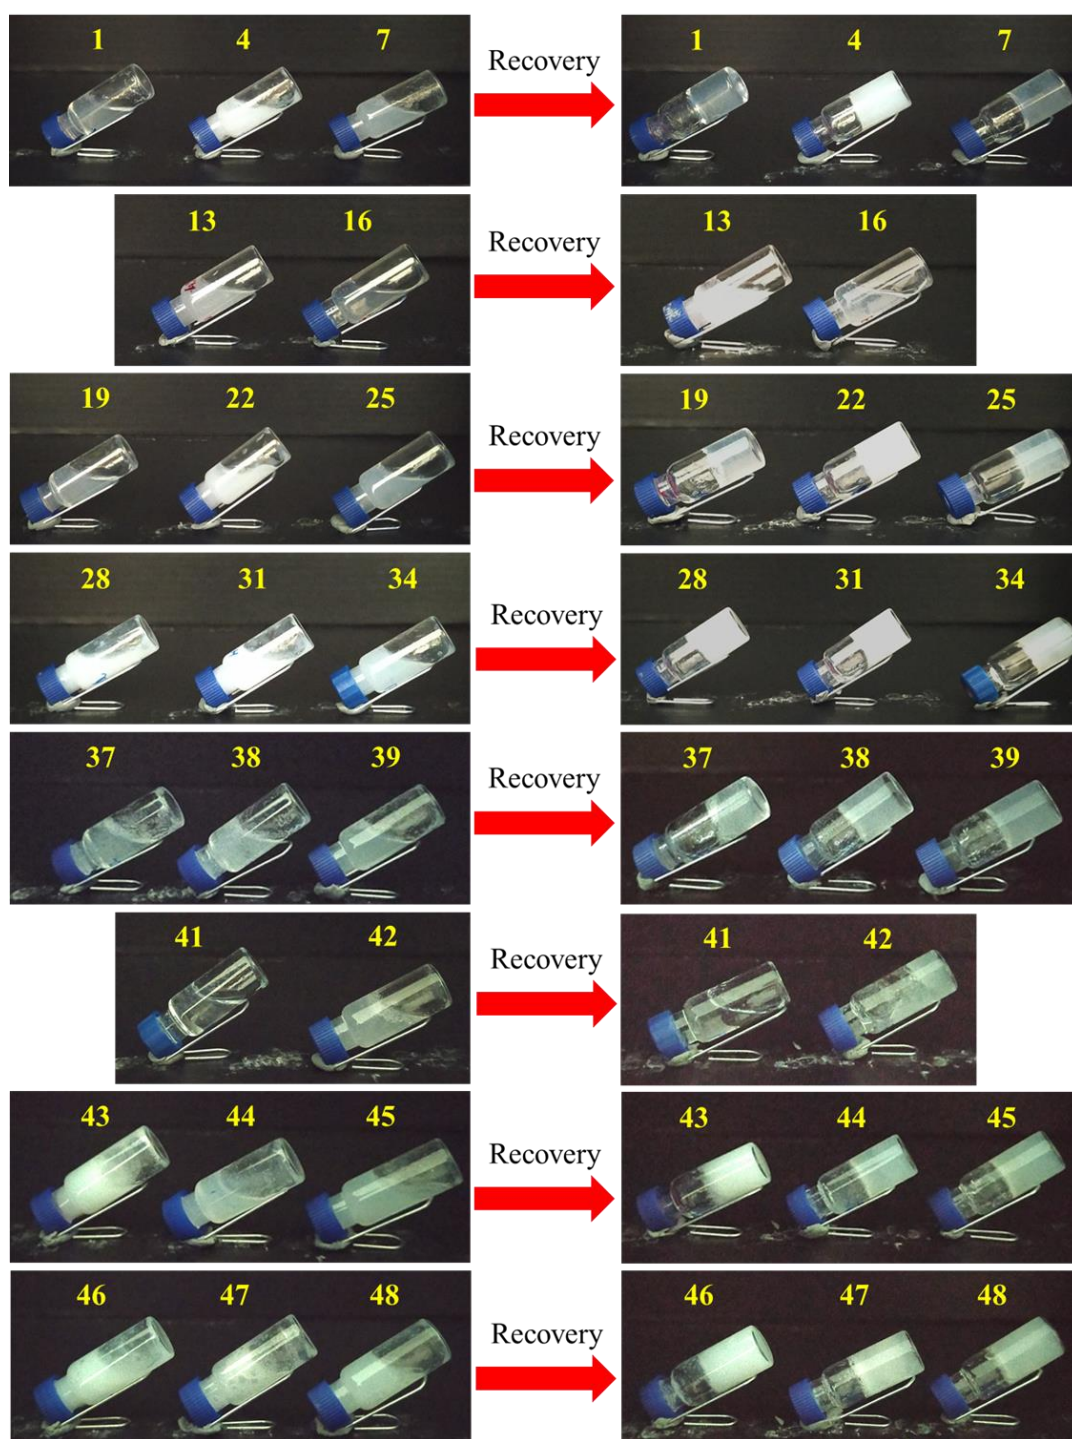

**Figure S16.** Thixotropic behaviour of the gels formed after vigorous shaking (left) and 16 hours of recovery (right).

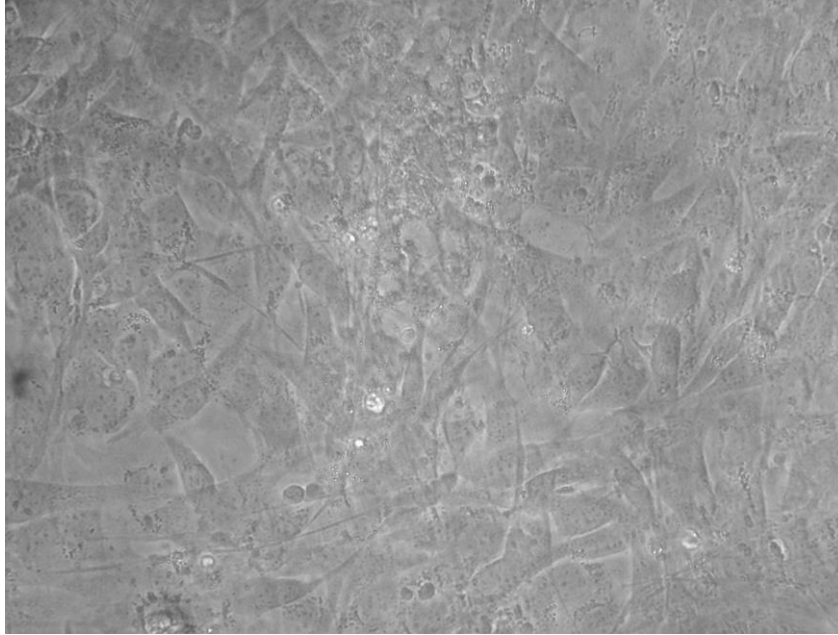

**Figure S17.** Optical micrograph of cells in DPBS (control).
